# Supplementary material for: Time‐Efficient Inspiratory Muscle Strength Training Lowers Blood Pressure and Improves Endothelial Function, NO Bioavailability, and Oxidative Stress in Midlife/Older Adults With Above‐Normal Blood Pressure
Source: PubMed Central journal article supplement — J Am Heart Assoc. 2021 Jun 29;10(13):e020980. doi: 10.1161/JAHA.121.020980 (PMC8403283; doi:10.1161/jaha.121.020980), 2021-06-29

# **SUPPLEMENTAL MATERIAL**

**Table S1. Follow-Up Subject Characteristics**

|                                    | Sham     |                      |           | IMST     |                      |           |
|------------------------------------|----------|----------------------|-----------|----------|----------------------|-----------|
|                                    | Baseline | End-<br>Intervention | Follow-Up | Baseline | End-<br>Intervention | Follow-up |
| N, men/women                       | 9/5      | --                   | --        | 7/8      | --                   | --        |
| Age, years                         | 68±2     | --                   | --        | 69±2     | --                   | --        |
| Body mass, kg                      | 79±3     | 79±3                 | 78±3      | 73±3     | 73±3                 | 73±3      |
| Body mass index, kg/m <sup>2</sup> | 27.0±1.0 | 27.1±1.0             | 26.8±1.0  | 25.7±0.6 | 25.7±0.5             | 25.6±0.6  |
| Resting heart rate, beats/min      | 61±2     | 62±3                 | 62±3      | 63±3     | 62±2                 | 63±2      |
| Total cholesterol, mg/dL           | 169±8    | 169±8                | 156±8     | 170±5    | 167±5                | 173±6     |
| HDL-cholesterol, mg/dL             | 50±3     | 49±3                 | 48±3      | 49±4     | 48±4                 | 52±4      |
| LDL-cholesterol, mg/dL             | 100±6    | 100±6                | 94±4      | 98±5     | 100±4                | 98±5      |
| Triglycerides, mg/dL               | 97±9     | 101±11               | 89±9      | 112±13   | 109±13               | 118±15    |
| Glucose, mg/dL                     | 91±2     | 89±2                 | 87±2      | 91±1     | 91±2                 | 88±2      |

Data are mean±SEM.

**Table S2. Ambulatory Blood Pressure**

|                     | Sham     |                      | IMST     |                      |
|---------------------|----------|----------------------|----------|----------------------|
|                     | Baseline | End-<br>Intervention | Baseline | End-<br>Intervention |
| Daytime SBP, mmHg   | 140±3    | 146±4                | 136±3    | 133±3 <sup>†</sup>   |
| Nighttime SBP, mmHg | 124±3    | 130±5*               | 119±4    | 116±4 <sup>†</sup>   |
| Daytime DBP, mmHg   | 79±2     | 83±2*                | 79±2     | 78±2                 |
| Nighttime DBP, mmHg | 68±2     | 71±3                 | 64±2     | 64±2 <sup>†</sup>    |
| SBP dipping, %      | 11±1     | 11±2                 | 12±2     | 13±2                 |
| DBP dipping, %      | 14±1     | 14±2                 | 16±2     | 18±2                 |

Data are mean±SEM. \* p<0.05 vs. Baseline, <sup>†</sup> p<0.05 vs. Sham.

**Table S3. Brachial Artery Parameters**

|                                               | Sham      |                  | IMST      |                         |
|-----------------------------------------------|-----------|------------------|-----------|-------------------------|
|                                               | Baseline  | End-Intervention | Baseline  | End-Intervention        |
| FMD <sub>BA</sub> , mm                        | 0.17±0.10 | 0.17±0.10        | 0.19±0.10 | 0.28±0.16* <sup>†</sup> |
| Baseline diameter, mm                         | 3.66±0.13 | 3.75±0.14        | 3.66±0.13 | 3.59±0.17               |
| FMD <sub>BA</sub> shear rate, s <sup>-1</sup> | 1782±144  | 1657±147         | 1838±162  | 1858±166                |
| Time to peak, s                               | 55±3      | 59±4             | 53±4      | 54±5                    |
| FMD <sub>BA</sub> /SR, %/s x 10 <sub>3</sub>  | 3.0±0.4   | 2.9±0.4          | 3.2±0.5   | 4.7±0.7* <sup>†</sup>   |
| Scaled FMD <sub>BA</sub> , %                  | 4.71±0.60 | 4.50±0.70        | 5.23±0.60 | 7.68±0.70* <sup>†</sup> |

Data are mean±SEM; FMD<sub>BA</sub>, brachial artery flow-mediated dilation; SR, shear rate. \* p<0.05 vs. Baseline, <sup>†</sup> p<0.05 vs. Sham.

**Table S4. Follow-Up Brachial Artery Parameters**

|                                               | Sham      |                  |           | IMST      |                         |           |
|-----------------------------------------------|-----------|------------------|-----------|-----------|-------------------------|-----------|
|                                               | Baseline  | End-Intervention | Follow-Up | Baseline  | End-Intervention        | Follow-up |
| FMD <sub>BA</sub> , mm                        | 0.16±0.02 | 0.17±0.03        | 0.15±0.02 | 0.20±0.03 | 0.29±0.05* <sup>†</sup> | 0.21±0.04 |
| Baseline diameter, mm                         | 3.71±0.17 | 3.75±0.15        | 3.68±0.16 | 3.77±0.13 | 3.71±0.18               | 3.83±0.22 |
| FMD <sub>BA</sub> shear rate, s <sup>-1</sup> | 1721±159  | 1606±153         | 1675±161  | 1807±191  | 1853±164                | 1857±208  |
| Time to peak, s                               | 55±3      | 53±4             | 53±5      | 55±6      | 52±6                    | 57±5      |
| FMD <sub>BA</sub> /SR, %/s x 10 <sup>3</sup>  | 2.8±0.3   | 3.0±0.5          | 2.7±0.3   | 3.3±0.6   | 4.4±0.6*                | 3.1±0.4   |
| Scaled FMD <sub>BA</sub> , %                  | 4.39±0.60 | 4.60±0.80        | 3.98±0.80 | 5.34±0.60 | 7.56±0.70 <sup>†</sup>  | 5.65±0.70 |

Data are mean±SEM; FMD<sub>BA</sub>, brachial artery flow-mediated dilation; SR, shear rate. \* p<0.05 vs. baseline, <sup>†</sup> p<0.05 vs. Sham.

**Table S5. Circulating Mechanistic Markers**

|                      | Sham      |                  | IMST      |                  |
|----------------------|-----------|------------------|-----------|------------------|
|                      | Baseline  | End-Intervention | Baseline  | End-Intervention |
| CRP, mg/L            | 1.19±0.35 | 1.23±0.31        | 1.37±0.23 | 0.96±0.17*       |
| IL-6, pg/mL          | 2.10±0.29 | 2.07±0.32        | 2.02±0.32 | 1.88±0.40        |
| IL-10, pg/mL         | 2.31±1.11 | 2.45±1.23        | 1.69±0.74 | 1.69±0.92        |
| TNF $\alpha$ , pg/mL | 5.05±0.86 | 5.11±0.87        | 3.52±0.85 | 3.59±0.86        |
| OxLDL, U/L           | 53±4      | 50±5             | 52±4      | 50±4             |
| TAS, mg/dL           | 1.56±0.04 | 1.53±0.04        | 1.48±0.06 | 1.46±0.05        |
| NE, pg/mL            | 333±46    | 331±46           | 273±44    | 315±45           |
| Epi, pg/mL           | 24±2      | 33±66            | 27±6      | 31±6             |

Data are mean±SEM; CRP, high-sensitivity C-reactive protein; IL-6, interleukin-6; IL-10, interleukin-10; TNF $\alpha$ , tumor necrosis factor  $\alpha$ ; OxLDL, oxidized low-density lipoprotein; TAS, total antioxidant status; NE, norepinephrine; Epi, epinephrine. \*  $p < 0.05$  vs. baseline.

**Table S6. Arterial Stiffness Parameters**

|                                                  | Sham          |                  | IMST          |                  |
|--------------------------------------------------|---------------|------------------|---------------|------------------|
|                                                  | Baseline      | End-Intervention | Baseline      | End-Intervention |
| CFPWV, m/s                                       | 9.65±0.40     | 9.92±0.55        | 9.43±0.49     | 9.64±0.36        |
| Carotid artery compliance, mm <sup>2</sup> /mmHg | 0.0995±0.0127 | 0.1000±0.0091    | 0.0834±0.0107 | 0.1188±0.0336    |
| Carotid β-stiffness index, U                     | 9.686±1.086   | 9.080±0.745      | 9.889±1.212   | 10.011±1.206     |
| Carotid IMT at end diastole, mm                  | 0.845±0.044   | 0.806±0.042      | 0.758±0.046   | 0.713±0.032      |

Data are mean±SEM; CFPWV, carotid-femoral pulse wave velocity; IMT, intima-media thickness.

**Table S7. Follow-Up Arterial Stiffness Parameters**

|                                                  | Sham          |                  |              | IMST         |                  |              |
|--------------------------------------------------|---------------|------------------|--------------|--------------|------------------|--------------|
|                                                  | Baseline      | End-Intervention | Follow-Up    | Baseline     | End-Intervention | Follow-up    |
| CFPWV, m/s                                       | 9.89±0.47     | 9.52±0.60        | 9.42±0.50    | 9.54±0.59    | 9.57±0.41        | 9.32±0.75    |
| Carotid artery compliance, mm <sup>2</sup> /mmHg | 0.0997±0.0132 | 0.0986±0.0078    | 0.0999±0.102 | 0.0724±0.102 | 0.1159±0.0388    | 0.0821±0.009 |
| Carotid β-stiffness index, U                     | 8.649±0.974   | 8.963±0.803      | 8.230±0.941  | 10.659±1.275 | 10.356±1.227     | 11.627±1.913 |
| Carotid IMT at end diastole, mm                  | 0.822±0.054   | 0.799±0.058      | 0.834±0.066  | 0.748±0.054  | 0.714±0.034      | 0.764±0.030  |

Data are mean±SEM; CFPWV, carotid-femoral pulse wave velocity; IMT, intima-media thickness.



Figure S1. Brachial artery flow-mediated dilation ( $FMD_{BA}$ ) expressed as percent at baseline, after 6 weeks of Sham or IMST (End-Intervention) and after abstaining from training for 6 weeks (Follow-Up). Data are mean $\pm$ SEM. † $p < 0.05$  vs Sham.

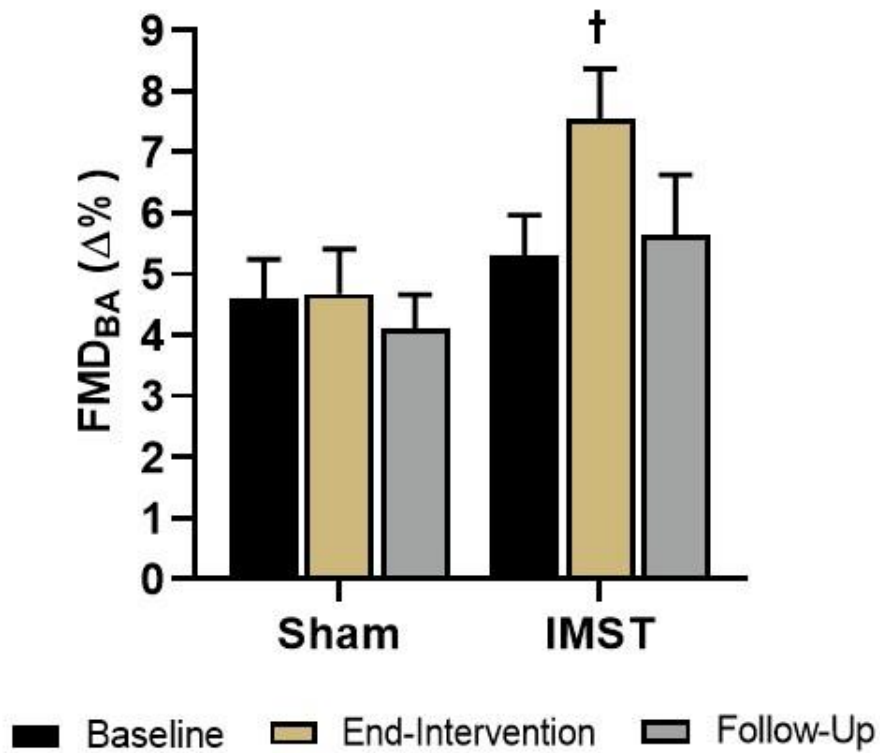

**Figure S2. Partial least squares-discriminant analysis of plasma metabolomics data comparing IMST and Sham groups (A) and a heat map of the top 25 metabolites by p-value (B).**

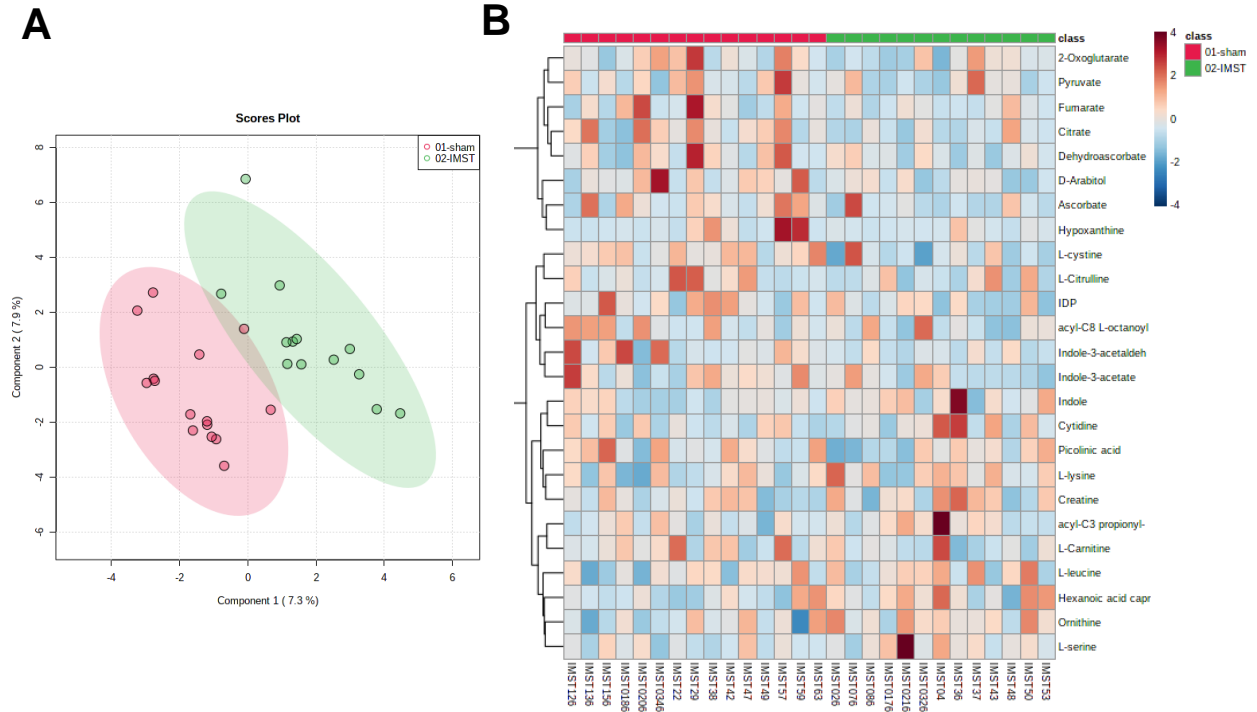

Supplement: JAH3-10-e020980-s001.pdf [file JAH3-10-e020980-s001.pdf]
